# Supplementary material
Source: publisher site journal article supplement (https://www.dovepress.com/article/446656)
Supplement: Supplementary file 1 [file get_supplementary_file.php]

**Supplementary file**


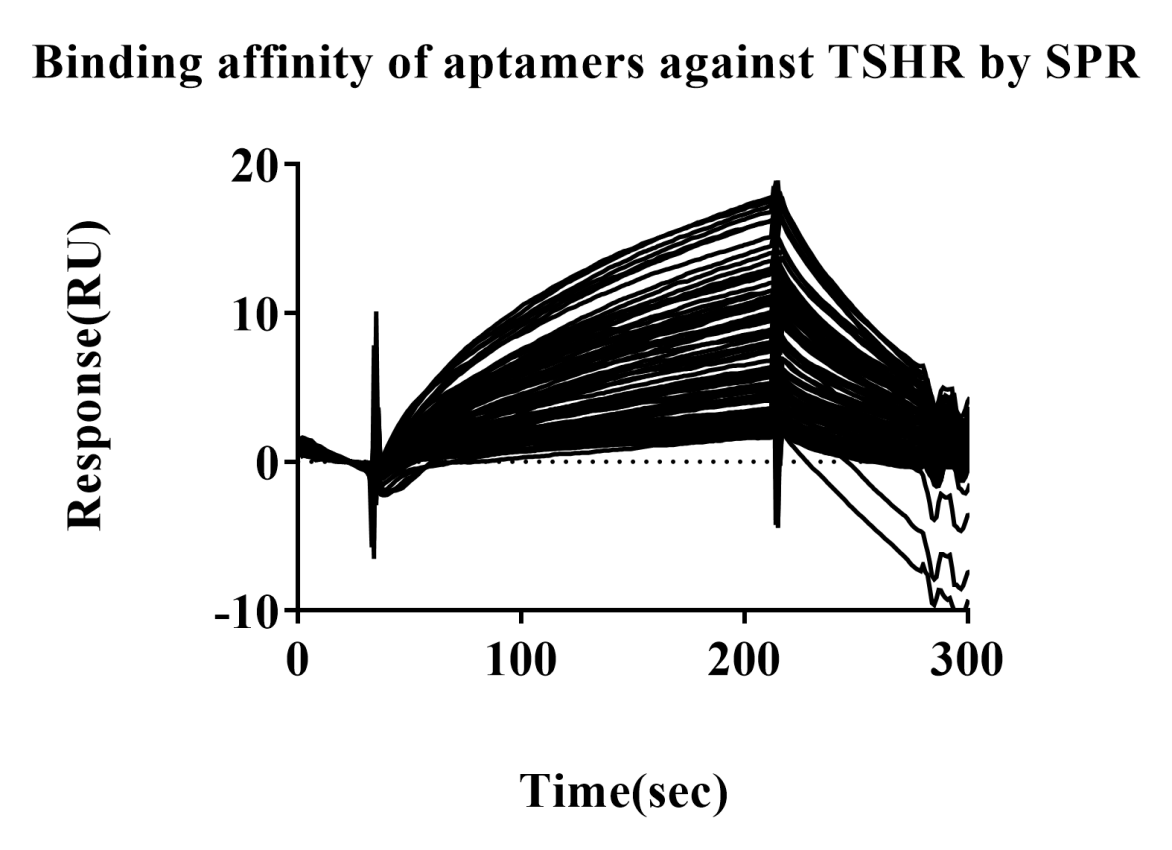


Supplementary Figure 1. SPR determination of the binding affinity of aptamers 1-80 to TSHR.


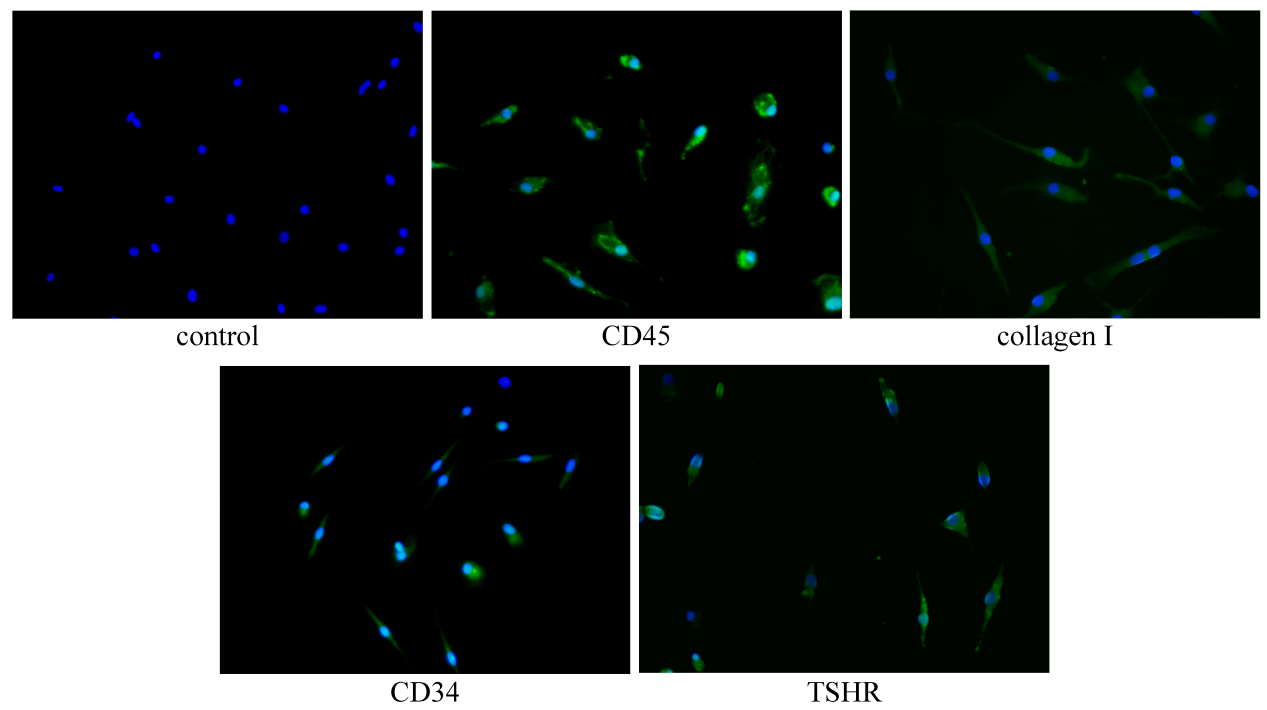


Supplementary Figure 2. Identification of fibrocytes by immunofluorescence staining.


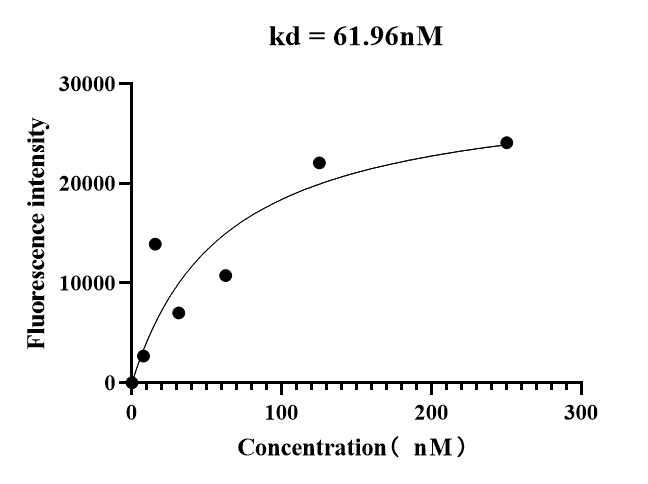


Supplementary Figure 3. Determination of the equilibrium dissociation constant of TSHR-21-42 to fibrocytes.


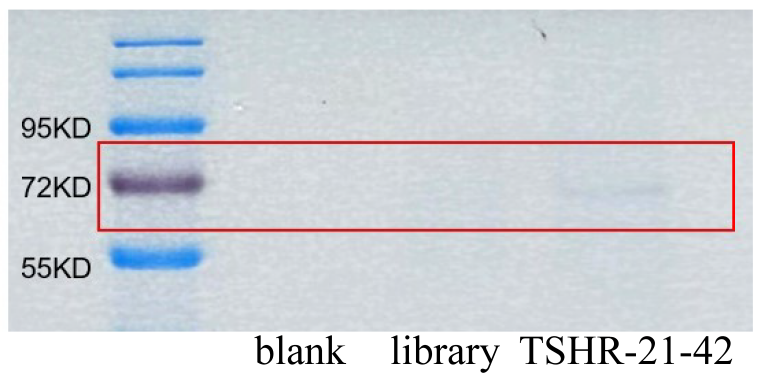


Supplementary Figure 4. Determination of the affinity of TSHR-21-42 to TSHR on fibrocytes mixed with total protein.


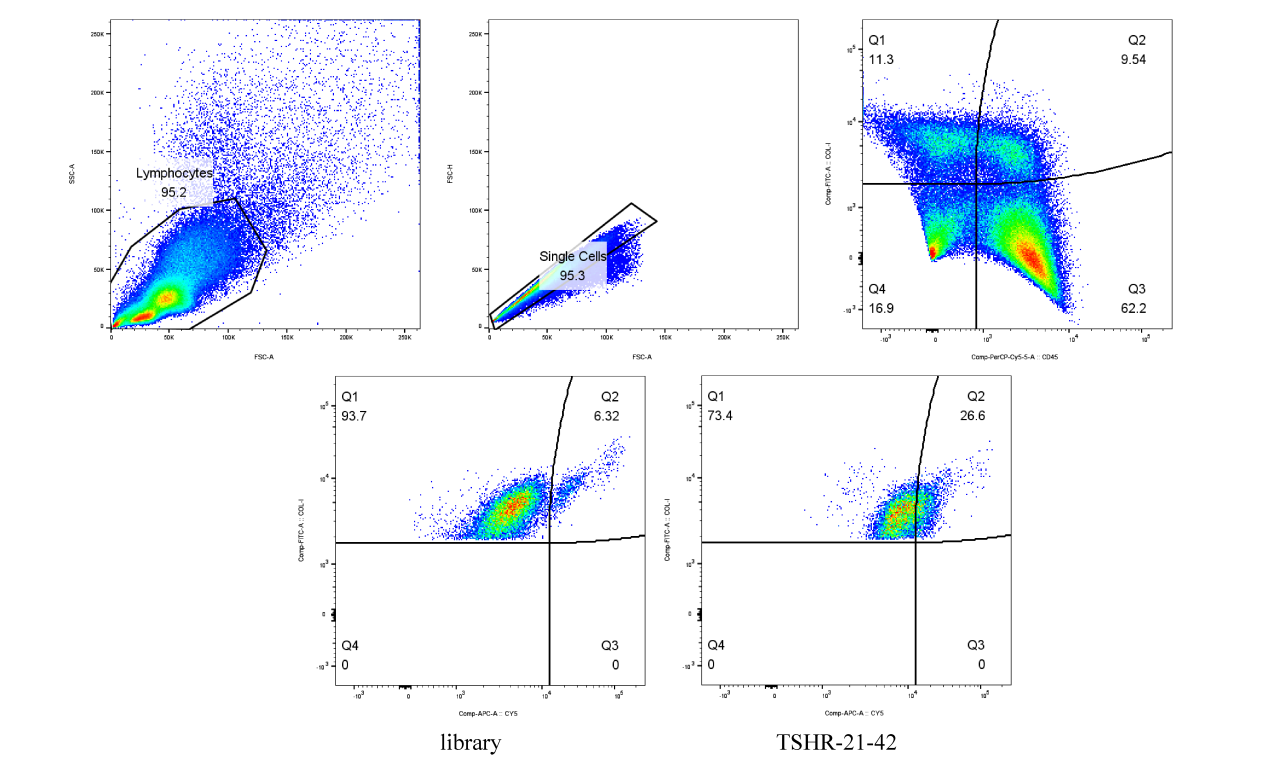


Supplementary Figure 5. Flow cytometry determination of the binding affinity of TSHR-21-42 to fibrocytes.


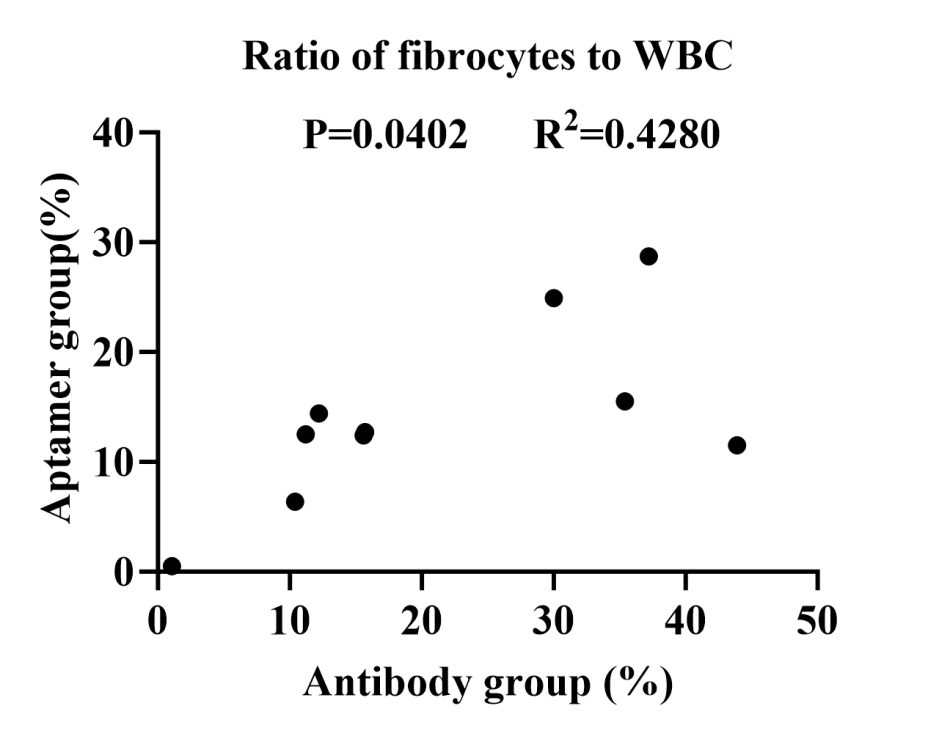


Supplementary Figure 6. Determination of the ratios of fibrocytes to total WBCs using the aptamer TSHR-21-42 and anti-TSHR antibody.


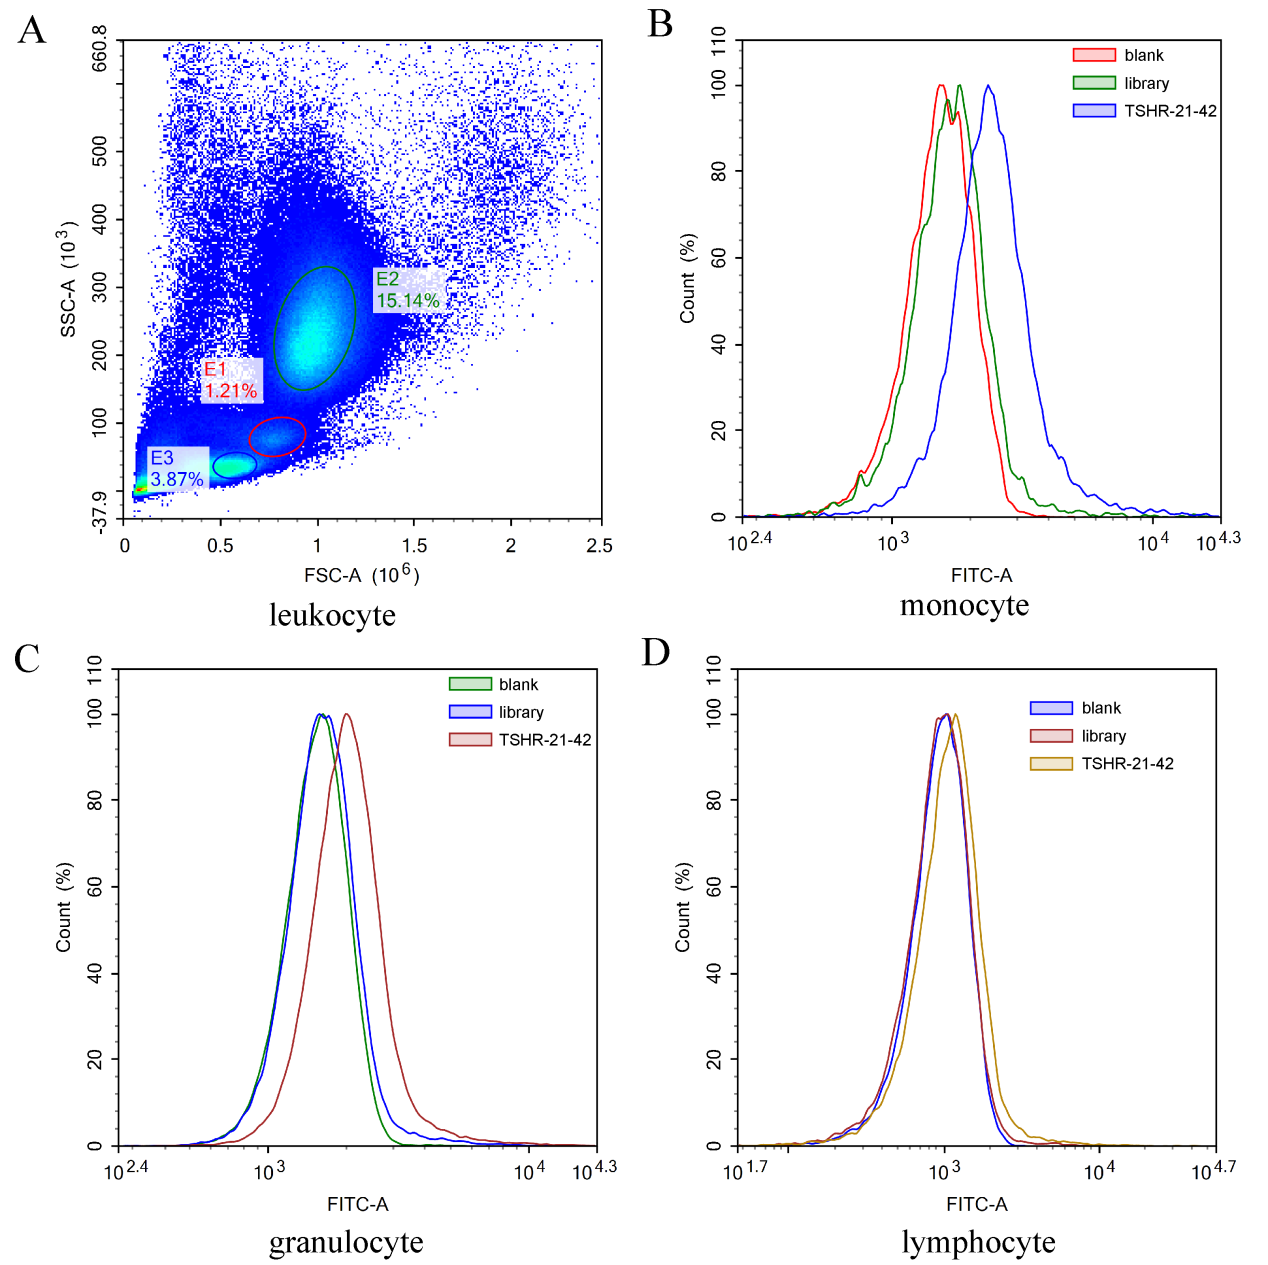


Supplementary Figure 7. Flow cytometry determination of the affinity of TSHR-21-42 to (A) leukocytes, (b) monocytes, (C) granulocytes and (D) lymphocytes.


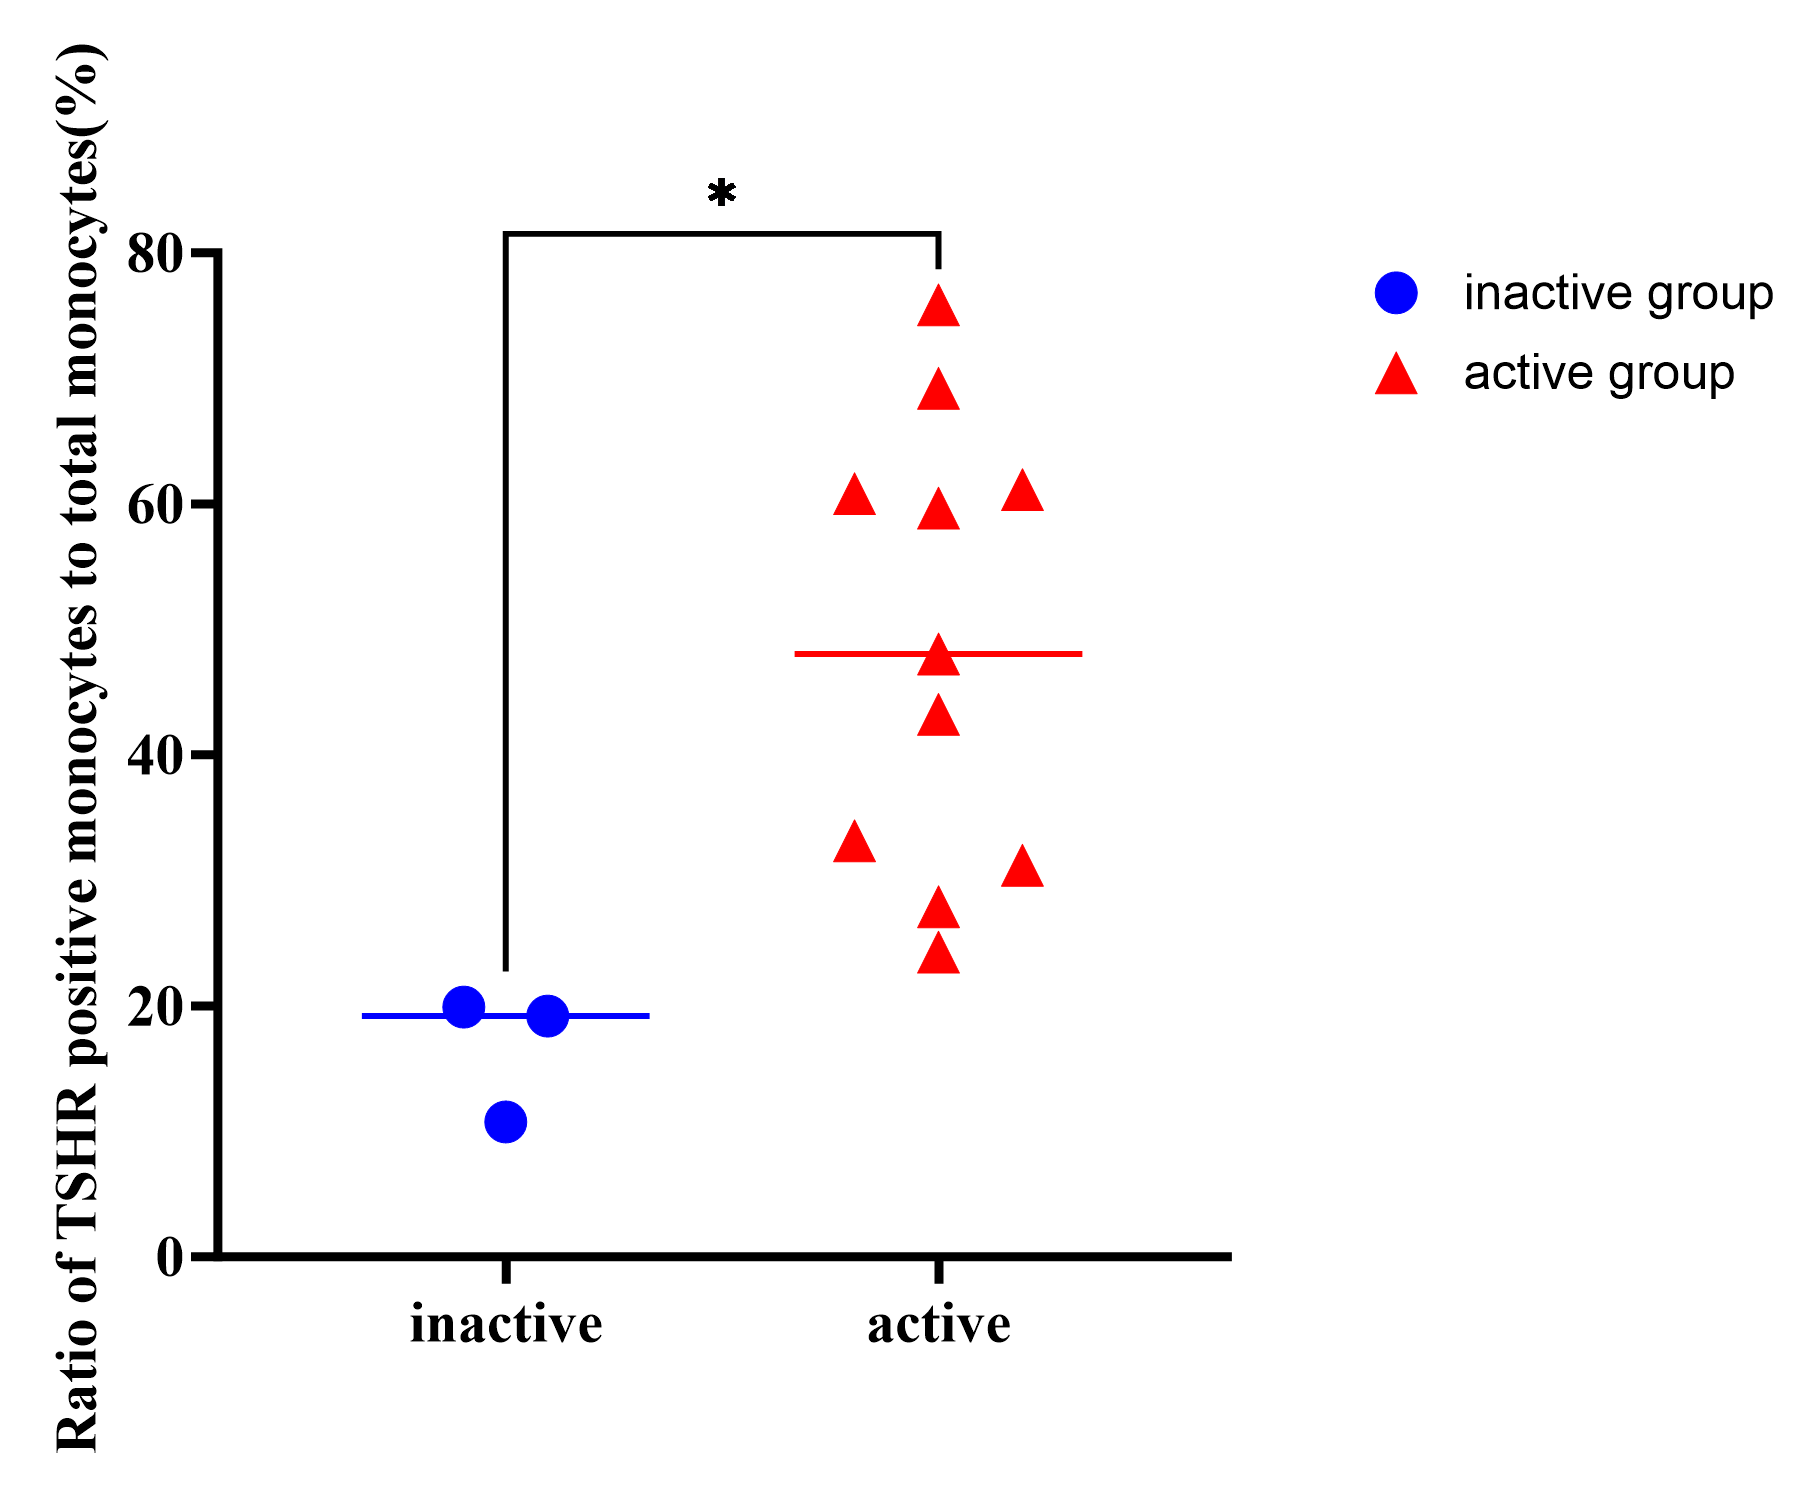


Supplementary Figure 8. Ratio of TSHR positive monocytes to total monocytes from patients with active and inactive TAO, as determined by binding of TSHR-21-42. *: p<0.05.


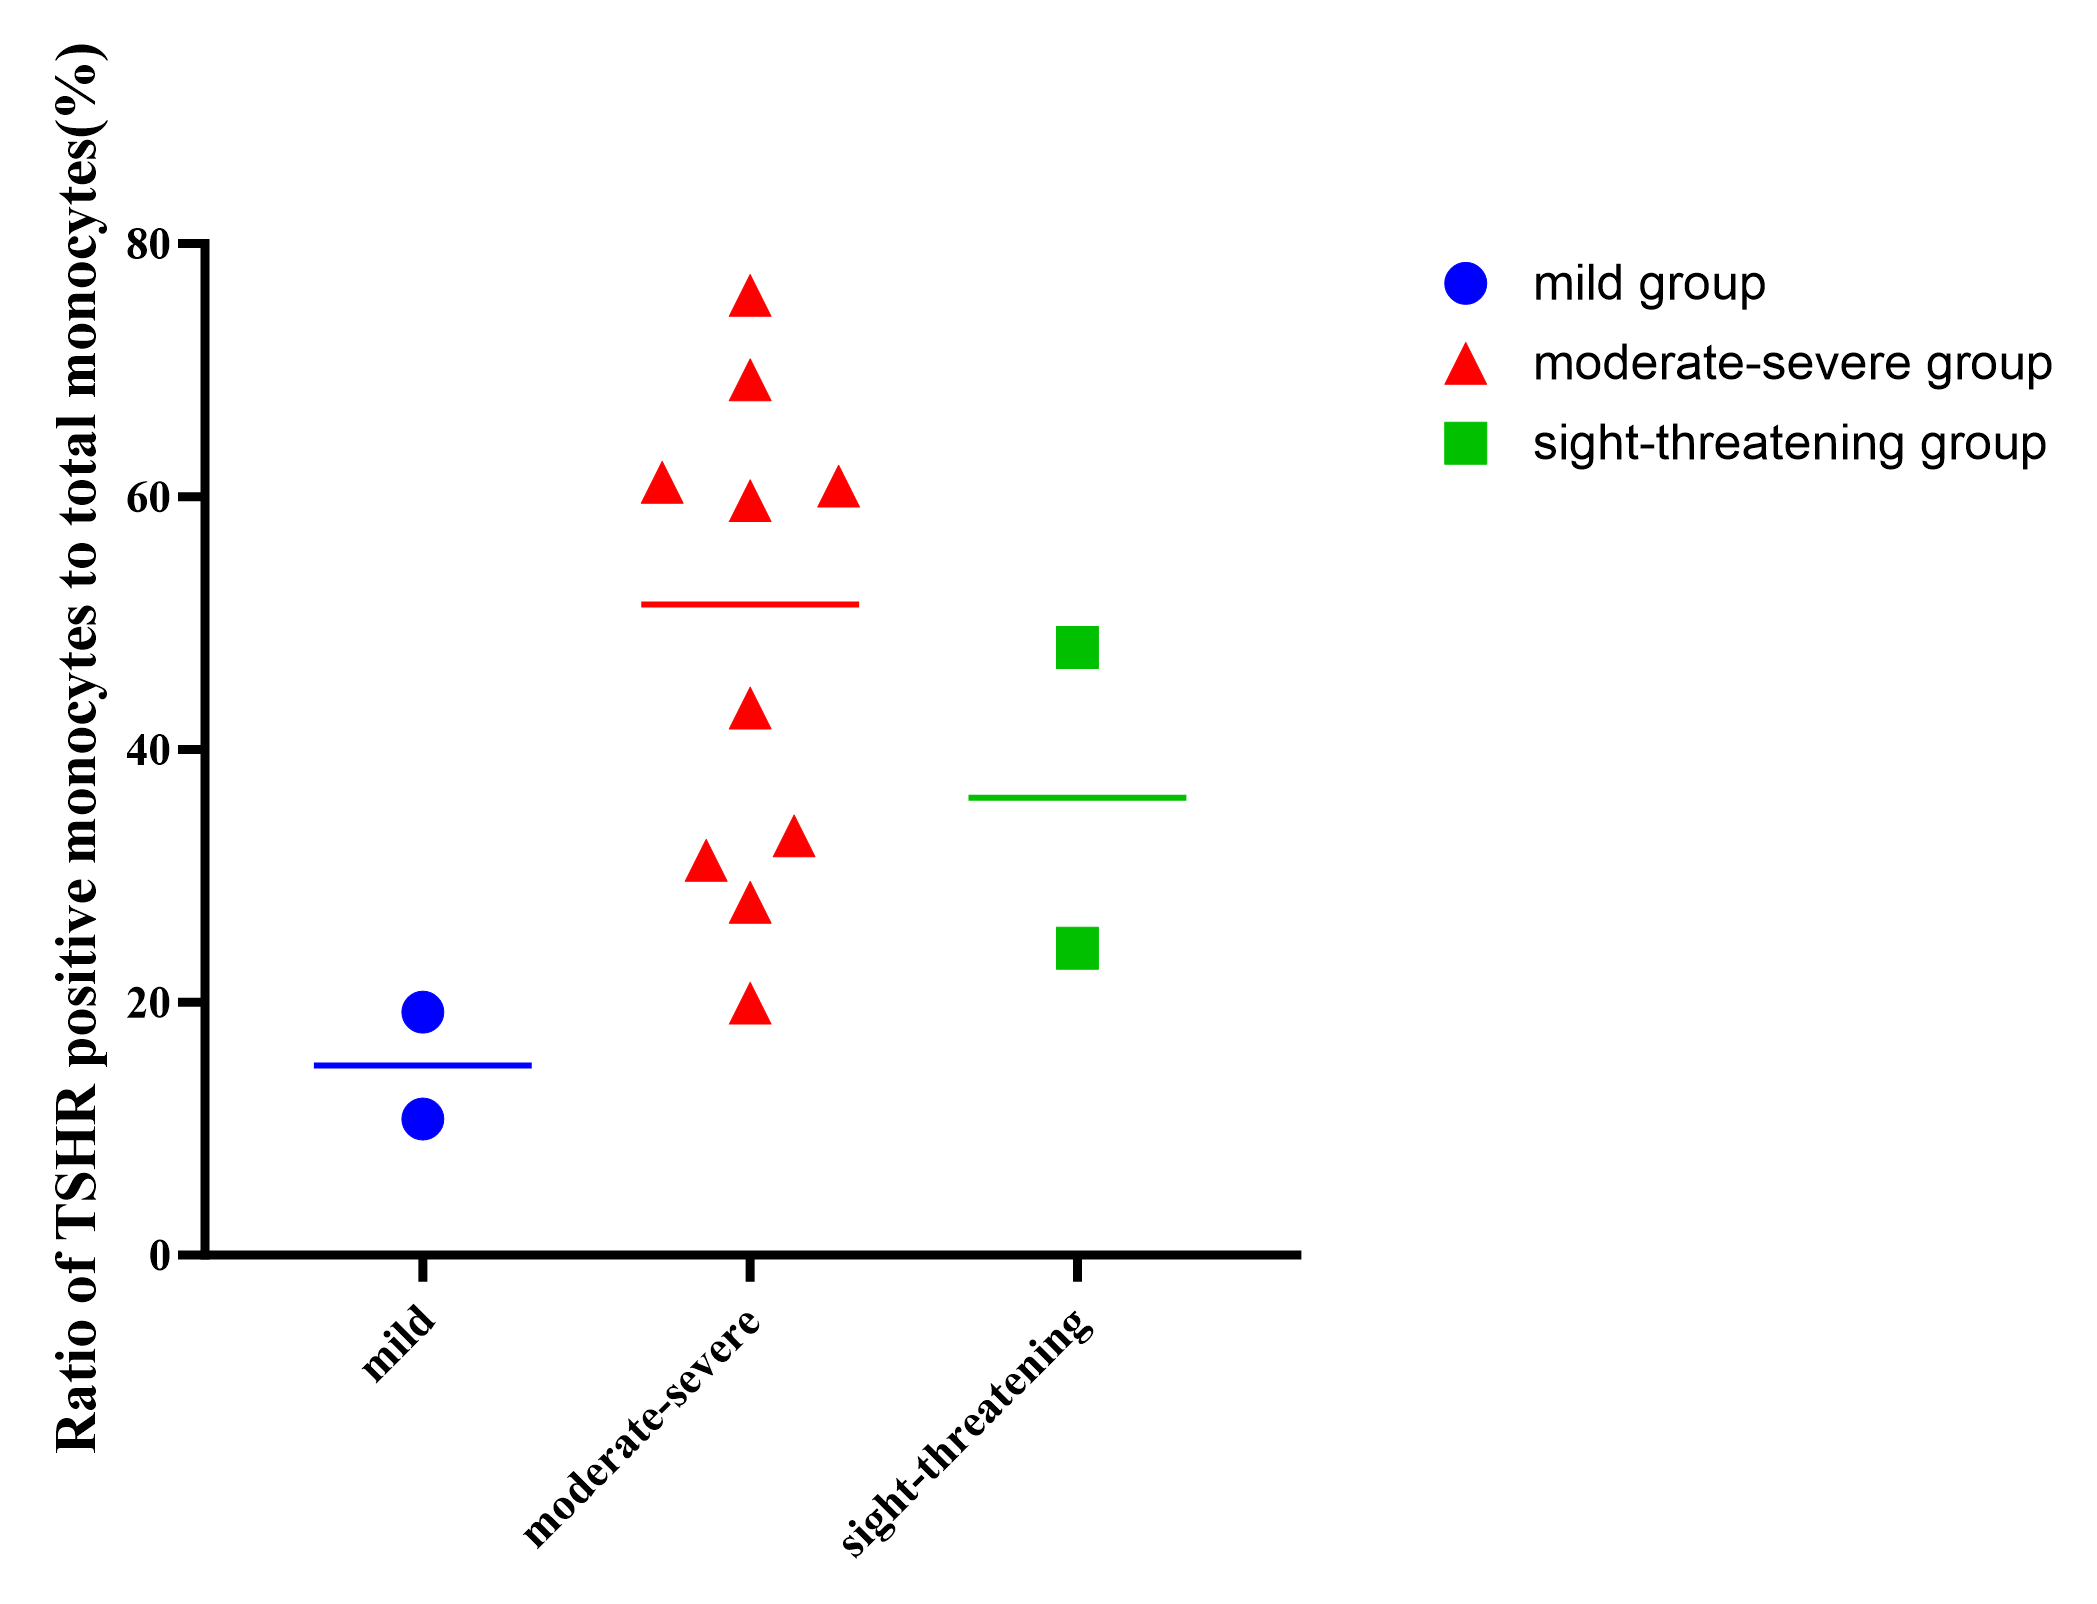


Supplementary Figure 9. Relationship of the percentage of TSHR positive monocytes, as determined by TSHR-21-42 binding, with the severity of TAO.

Supplementary Table 1 The information on the sequence

| Aptamer | Sequencing information |
| --- | --- |
| TSHR-18-56 | CACGCATAACTTAGCGGGGGACTGCTCGGGATTGCGGATACGATGTGTTATGCGTG |
| TSHR-18-34 | TTAGCGGGGGACTGCTCGGGATTGCGGATACGAT |
| TSHR-18-24 | TTAGCGGGGGACTGCTCGGGATTG |
| TSHR-21-56 | CACGCATAACATTTCGGGGGACTGCTCGGGATTGCGGATACGATGTGTTATGCGTG |
| TSHR-21-34 | ATTTCGGGGGACTGCTCGGGATTGCGGATACGAT |
| TSHR-21-42 | AACATTTCGGGGGACTGCTCGGGATTGCGGATACGATGTGTT |
| Library | AACNNNNNNNNNNNNNNNNNNNNNNNNNNNNNNNNNNGTGTT |

Supplementary Table 2 The basic clinical information of the sample

| **Number** | **Group** | **Data processing** | **Age** | **Gender** | **Race** | **CAS** | **Severity** | **Duration(month)** | **Autoimmune thyroid disorder** | **Glucocorticoid use** |
| --- | --- | --- | --- | --- | --- | --- | --- | --- | --- | --- |
| 1 | control | control vs TAO | 26 | male | Asian | - | - | - | - | - |
| 2 | control | control vs TAO | 52 | male | Asian | - | - | - | - | - |
| 3 | control | control vs TAO | 42 | female | Asian | - | - | - | - | - |
| 4 | control | control vs TAO | 34 | female | Asian | - | - | - | - | - |
| 5 | TAO | control vs TAO | 34 | male | Asian | 3 | moderate-to-severe | 24 | Graves' disease | - |
| 6 | TAO | control vs TAO | 59 | male | Asian | 6 | moderate-to-severe | 60 | Graves' disease | - |
| 7 | TAO | control vs TAO | 50 | female | Asian | 3 | moderate-to-severe | 10 | Graves' disease | - |
| 8 | TAO | control vs TAO | 29 | female | Asian | 1 | moderate-to-severe | 13 | Graves' disease | - |
| 9 | TAO | control vs TAO | 34 | female | Asian | 5 | moderate-to-severe | 5 | Graves' disease | - |
| 10 | TAO | aptamer vs antibody Related with CAS | 57 | male | Asian | 5 | moderate-to-severe | 5 | Graves' disease | - |
| 11 | TAO | aptamer vs antibody Related with CAS | 27 | female | Asian | 1 | moderate-to-severe | 60 | Graves' disease | - |
| 12 | TAO | aptamer vs antibody Related with CAS | 55 | male | Asian | 4 | sight-threatening | 5 | Graves' disease | - |
| 13 | TAO | aptamer vs antibody Related with CAS | 63 | female | Asian | 6 | moderate-to-severe | 2 | Graves' disease | - |
| 14 | TAO | aptamer vs antibody Related with CAS | 41 | female | Asian | 6 | moderate-to-severe | 12 | Graves' disease | - |
| 15 | TAO | aptamer vs antibody Related with CAS | 50 | female | Asian | 3 | moderate-to-severe | 12 | Graves' disease | - |
| 16 | TAO | aptamer vs antibody Related with CAS | 51 | female | Asian | 5 | moderate-to-severe | 6 | Graves' disease | - |
| 17 | TAO | aptamer vs antibody Related with CAS | 43 | female | Asian | 4 | moderate-to-severe | 2 | Graves' disease | - |
| 18 | TAO | aptamer vs antibody Related with CAS | 48 | female | Asian | 4 | moderate-to-severe | 10 | Graves' disease | - |
| 19 | TAO | aptamer vs antibody Related with CAS | 57 | female | Asian | 2 | mild | 2 | Graves' disease | - |
| 20 | TAO | Related with CAS | 51 | female | Asian | 4 | moderate-to-severe | 6 | Graves' disease | - |
| 21 | TAO | Related with CAS | 27 | female | Asian | 3 | sight-therating | 24 | Graves' disease | - |
| 22 | TAO | Related with CAS | 57 | male | Asian | 3 | moderate-to-severe | 26 | Graves' disease | - |
| 23 | TAO | Related with CAS | 45 | female | Asian | 0 | mild | 24 | Graves' disease | - |
